# Supplementary material for: Motion Plan Changes Predictably in Dyadic Reaching
Source: PubMed Central journal article supplement (PMC5135107; doi:10.1371/journal.pone.0167314), 2016-12-02
Supplement: pone.0167314.s013.pdf [file pone.0167314.s013.pdf]

| <b>Dyad</b> | <b>Coupled</b>                                                                                                                                                   | <b>Push-pull 1</b>                                           | <b>Push-pull 2</b>                                                                              |
|-------------|------------------------------------------------------------------------------------------------------------------------------------------------------------------|--------------------------------------------------------------|-------------------------------------------------------------------------------------------------|
| <b>I</b>    | –                                                                                                                                                                | –                                                            | Bin 1 – Bin 5 (0.79 – 1.20 s)<br>Bin 1 – Bin 6 (0.87 – 1.06 s)<br>Bin 2 – Bin 5 (0.88 – 1.20 s) |
| <b>II</b>   | –                                                                                                                                                                | –                                                            | –                                                                                               |
| <b>III</b>  | Bin 2 – Bin 3 (0.38 – 0.45 s)                                                                                                                                    | –                                                            | –                                                                                               |
| <b>IV</b>   | –                                                                                                                                                                | –                                                            | –                                                                                               |
| <b>V</b>    | –                                                                                                                                                                | –                                                            | –                                                                                               |
| <b>VI</b>   | –                                                                                                                                                                | –                                                            | Bin 2 – Bin 6 (0.78 – 0.90 s) Bin<br>2 – Bin 6 (0.81 – 1.05 s)                                  |
| <b>VII</b>  | –                                                                                                                                                                | Bin 2 – Bin 4 (0.70 – 1.2 s)<br>Bin 2 – Bin 5 (0.74 – 1.2 s) | –                                                                                               |
| <b>VIII</b> | Bin 1 – Bin 2 (0.68 – 0.88 s)<br>Bin 1 – Bin 3 (0.57 – 1.04 s)<br>Bin 1 – Bin 4 (0.50 – 1.2 s)<br>Bin 1 – Bin 5 (0.56 – 1.08 s)<br>Bin 1 – Bin 6 (0.69 – 0.86 s) | –                                                            | Bin 1 – Bin 4 (0.50 – 0.80, 1.03<br>– 1.2 s)<br>Bin 1 – Bin 6 (0.50 – 0.85, 0.96<br>– 1.2 s)    |
