# Supplementary material for: Motion Plan Changes Predictably in Dyadic Reaching
Source: PubMed Central journal article supplement (PMC5135107; doi:10.1371/journal.pone.0167314), 2016-12-02
Supplement: pone.0167314.s014.pdf [file pone.0167314.s014.pdf]

| Partner          |               | Coupled |      | Washout |        | Push-pull |       | Washout |        | Push-pull |       | Washout |        |
|------------------|---------------|---------|------|---------|--------|-----------|-------|---------|--------|-----------|-------|---------|--------|
|                  |               | Blue    | Red  | Blue    | Red    | Blue      | Red   | Blue    | Red    | Blue      | Red   | Blue    | Red    |
| <b>Dyad I</b>    | <b>Q(1,1)</b> | 0.54    | 2.17 | 47.17   | 28.48  | 0.19      | 9.01  | 72.24   | 27.13  | 2.58      | 0.79  | 103.58  | 23.75  |
|                  | <b>Q(2,2)</b> | 0.11    | 0.05 | 1.46    | 1.15   | 0.15      | 0.21  | 1.96    | 1.06   | 0.05      | 0.11  | 1.92    | 1.22   |
| <b>Dyad II</b>   | <b>Q(1,1)</b> | 1.91    | 2.15 | 26.11   | 26.28  | 3.66      | 5.69  | 41.54   | 64.05  | 1.68      | 7.5   | 43.35   | 63.92  |
|                  | <b>Q(2,2)</b> | 0.13    | 0.06 | 1.3     | 1.33   | 0.18      | 0.2   | 1.58    | 1.89   | 0.17      | 0.02  | 1.35    | 1.92   |
| <b>Dyad III</b>  | <b>Q(1,1)</b> | 7.84    | 5.56 | 29.02   | 49.47  | 6.84      | 0.98  | 21.01   | 40.83  | 1.6       | 11.28 | 24.94   | 118.23 |
|                  | <b>Q(2,2)</b> | 0.25    | 0.15 | 1.46    | 1.43   | 0.01      | 0.4   | 1.31    | 1.47   | 0.34      | 0.3   | 1.42    | 1.2    |
| <b>Dyad IV</b>   | <b>Q(1,1)</b> | 3.16    | 5.13 | 25.58   | 26.47  | 0.3       | 13.12 | 113.6   | 43.74  | 2.82      | 0.97  | 52.63   | 27.51  |
|                  | <b>Q(2,2)</b> | 0.12    | 0.22 | 1.14    | 1.32   | 0.23      | 0.01  | 1.99    | 1.6    | 0.67      | 1.15  | 1.75    | 1.04   |
| <b>Dyad V</b>    | <b>Q(1,1)</b> | 11.28   | 8.99 | 110.79  | 59.35  | 4.43      | 16.11 | 118.81  | 152.16 | 21.41     | 1.45  | 58.03   | 47.89  |
|                  | <b>Q(2,2)</b> | 0.01    | 0.45 | 1.7     | 1.82   | 0.09      | 0.57  | 1.66    | 2.09   | 0.01      | 0.34  | 1.8     | 1.45   |
| <b>Dyad VI</b>   | <b>Q(1,1)</b> | 9.72    | 6.55 | 57.35   | 253.77 | 16.77     | 1.28  | 30.96   | 127.77 | 11.12     | 2.13  | 24.88   | 162.88 |
|                  | <b>Q(2,2)</b> | 0.28    | 0.32 | 2.21    | 2.21   | 0.77      | 0.13  | 1.17    | 2.2    | 1         | 0.01  | 1.41    | 2.21   |
| <b>Dyad VII</b>  | <b>Q(1,1)</b> | 2.55    | 1.9  | 55.89   | 22.38  | 0.3       | 5.84  | 22.43   | 21.88  | 7.75      | 0.01  | 19.27   | 26.28  |
|                  | <b>Q(2,2)</b> | 0.01    | 0.19 | 1.87    | 1.37   | 0.01      | 0.42  | 1.54    | 1.74   | 0.35      | 0.04  | 1.98    | 1.16   |
| <b>Dyad VIII</b> | <b>Q(1,1)</b> | 4.3     | 6.14 | 42.24   | 59.92  | 7.72      | 1.04  | 45.77   | 213.43 | 1.9       | 8.76  | 75.74   | 61.65  |
|                  | <b>Q(2,2)</b> | 0.23    | 0.1  | 1.75    | 1.74   | 0.32      | 0.06  | 1.4     | 2.2    | 0.36      | 0.01  | 1.63    | 1.81   |
